# Supplementary material
Source: PubMed Central journal article supplement (PMC2889363)
Supplement: 0905745107_pnas.200905745SI.pdf [file 0905745107_pnas.200905745SI.pdf]

# Supporting Information

Peyrin-Biroulet et al. 10.1073/pnas.0905745107

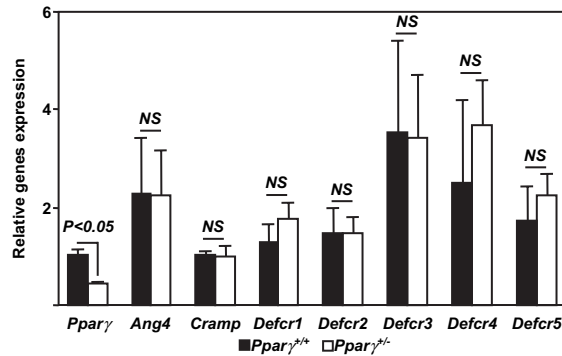

**Fig. S1.** PPAR $\gamma$  is dispensable for cryptdins, angiogenin-4, and LL-37 expression in mouse small intestine. To avoid estrus variation, the terminal ileum of 8-week-old *Pparγ* heterozygous males and their WT littermates ( $n = 4$ ) were dissected out, flushed with cold PBS, and processed for gene expression analysis. Values represent the mean of normalized data  $\pm$  SEM, as measured by real-time qPCR. NS, not significant.

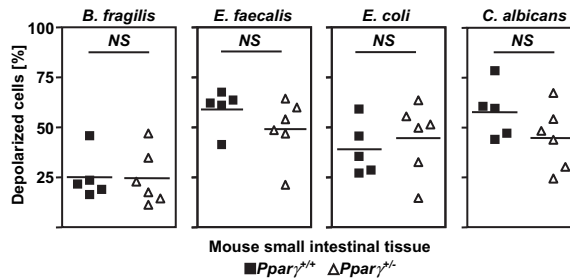

**Fig. S2.** PPAR $\gamma$  is dispensable for microbicidal activity in mouse small intestine. Membrane depolarization of *B. fragilis* (ATCC 25285), *E. faecalis* (clinical isolate 404), *E. coli* (clinical isolate 304446), and *C. albicans* (clinical isolate 526) by cationic proteins extracted from ileal mucosal biopsy specimens from *Pparγ*<sup>+/-</sup> mice compared with their WT littermates.  $P$  values were determined by the Mann-Whitney test. NS, not significant.

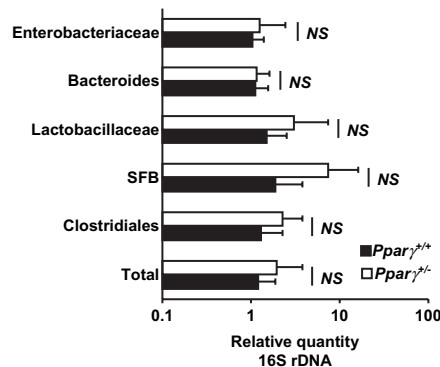

**Fig. S3.** Composition of the major fecal bacterial communities is unchanged in *Pparγ*<sup>+/-</sup> mice. The relative proportion of the major fecal groups of bacterial commensals was similar in *Pparγ*<sup>+/-</sup> mice and their WT littermates ( $n = 5$  per group), as quantified by real-time qPCR of total bacterial 16S rDNA in feces. The mean of normalized data  $\pm$  SEM are depicted. NS, not significant.

**Table S1. PPAR $\gamma$  potential binding sites within *DEFB1* promoter region identified by Nubiscan (blue), Matinspector (red), or both (green)**

| Site      | Sequence (5'-3') | Type | Position (5'-3') |
|-----------|------------------|------|------------------|
| Consensus | AGGTCA-AGGTCA    |      |                  |
| First     | AGGTGCcaCAGTCA   | DR2  | -150 to -163     |
| Second    | CGATTAgAAGTTCA   | DR2  | -181 to -168     |
| Third     | AGGGCa-ATGACA    | DR1  | -205 to -193     |
| Fourth    | AGGCTGaaAGCTAA   | DR2  | -270 to -257     |
| Fifth     | AGGGAgaGGGTGA    | DR2  | -491 to -478     |
| Sixth     | AGGGGAg-AGATGA   | DR1  | -559 to -547     |
| Seventh   | AGGAAAgcTGCTCA   | DR2  | -841 to -828     |
| Eighth    | AGGGAAg-AGTTTA   | DR1  | -898 to -910     |
| Ninth     | AGGATAtcAGGGTT   | DR2  | -916 to -929     |

The PPAR $\gamma$  potential binding sites not confirmed by EMSA are in italic type.

**Table S2. PPAR $\gamma$  potential binding sites within the *mDefb10* promoter region identified by Nubiscan (blue), Matinspector (red), or both (green)**

| Site      | Sequence (5'-3') | Type | Position (5'-3') |
|-----------|------------------|------|------------------|
| Consensus | AGGTCA-AGGTCA    |      |                  |
| First     | TGGTAGaaAGGGCA   | DR2  | -4 to -17        |
| Second    | CTGTCAa-AGAACA   | DR1  | -268 to -256     |
| Third     | AGAACTg-TGGGCT   | DR1  | -348 to -336     |
| Fourth    | GGGACTg-TGATCA   | DR1  | -501 to -489     |
| Fifth     | ATGTGCTtAGTCt    | DR2  | -636 to -623     |
| Sixth     | GGTCCt-AGTCC     | DR1  | -773 to -785     |
| Seventh   | AGTCAAg-GGGTCA   | DR1  | -889 to -877     |

The PPAR $\gamma$  potential binding sites not confirmed by EMSA are in italic type.

**Table S3. Primer sequences for qPCR analysis**

|                                 | Forward primer (5'-3')     | Backward primer (5'-3')    |
|---------------------------------|----------------------------|----------------------------|
| Mouse gene                      |                            |                            |
| <i>Actb</i>                     | CCATGTCGTCAGTTGGTAA        | GAATGGGTCAGAAGGACTCCTATGT  |
| <i>Ppar-<math>\gamma</math></i> | TTGCTGAACGTGAAGCCATCGAGG   | GTCCTGTAGATCTCCTGGAGCAG    |
| <i>Ang-4</i>                    | CTCTGGCTCAGAATGTAAGGTACGA  | GAAATCTTTAAAGGCTCGGTACCC   |
| <i>Cramp</i>                    | GCTGATTCTTTTGACATCAGCTGTAA | GCCAGCCGGGAAAATTTTCT       |
| <i>Defcr1</i>                   | TAGTCTTTCATCTGTGTTTGGATAGG | ACTAGTCTCCTCTCTGCCCTTGT    |
| <i>Defcr2</i>                   | CCAGGCTGATCCTATCCAAA       | TCTCTCAACGCGTCACATTC       |
| <i>Defcr3</i>                   | CCAGGCTGATCCTATCCAAA       | GTCCCATTCATGCGTTTCT        |
| <i>Defcr4</i>                   | TGGCCTCAAAGGAGATAGACA      | AGGCTGATCCTATCCAAAACACA    |
| <i>Defcr5</i>                   | AGGCTGATCCTATCCAAAACAG     | TGAAGAGCAGACCTTCTTGGC      |
| <i>Defb10</i>                   | TTGCTGGTAATAGCAGGTTTATGA   | CGGAGATTCTCTGGGTGACAGT     |
| <i>Defb1</i>                    | TCCTGGTGATGATATGTTTCTTTTCT | TGTTCTTCGTCGAAGACTTGTGA    |
| Human gene                      |                            |                            |
| <i>ACTB</i>                     | CCTGGCACCCAGCAAT           | GCCGATCCACACGGAGTACT       |
| <i>ADRP</i>                     | TGAGATGGCAGAGAACGGTGTG     | GGCATTGGCAACAATCTGAT       |
| <i>DEFB-1</i>                   | ATACTTCAAAGCAATTTTCTTTAT   | TTGTCTGAGATGGCCTCAGGTGGTAA |
| <i>IL-8</i>                     | AAGGAACCATCTCACTGTGTAAAC   | AAATCAGGAAGGCTGCCAAGA      |
| <i>PPAR<math>\gamma</math></i>  | TTCAAGAGTACCAAAGTGCAATCAA  | AATAAGGTGGAGATGCAGGCTC     |
| <i>TNF-<math>\alpha</math></i>  | GGCATGAATCCTCCTTCGTA       | AGCTCTGCAGTTGGGACAGT       |

**Table S4. Clinical characteristics of the 21 patients with isolated ileal CD (L1 according to the Montreal classification)**

| Patient no. | Age, years | Sex | Disease behavior (Montreal classification) | Perianal disease | Disease duration, years | Personal history of intestinal resection | Previous medications          | Concomitant medications          |
|-------------|------------|-----|--------------------------------------------|------------------|-------------------------|------------------------------------------|-------------------------------|----------------------------------|
| 1           | 23         | M   | B2                                         | No               | 7                       | No                                       | 5-ASA, steroids               | Budesonide, azathioprine         |
| 2           | 31         | F   | B2                                         | No               | 6                       | No                                       | None                          | None                             |
| 3           | 62         | M   | B2                                         | Yes              | 15                      | No                                       | 5-ASA, steroids               | Budesonide                       |
| 4           | 79         | F   | B2                                         | No               | < 1                     | No                                       | None                          | None                             |
| 5           | 28         | M   | B2                                         | No               | NA                      | No                                       | None                          | None                             |
| 6           | 43         | F   | B3                                         | No               | 10                      | Yes                                      | Steroids                      | 5-ASA                            |
| 7           | 28         | F   | B2                                         | No               | 3                       | No                                       | 5-ASA, steroids               | Budesonide                       |
| 8           | 53         | M   | B2                                         | No               | < 1                     | No                                       | None                          | None                             |
| 9           | 26         | M   | B3                                         | Yes              | 8                       | No                                       | Steroids                      | 5-ASA                            |
| 10          | 26         | M   | B2                                         | Yes              | 1                       | No                                       | Enteral nutrition             | None                             |
| 11          | 50         | M   | B2                                         | Yes              | 22                      | No                                       | 5-ASA, steroids, azathioprine | Azathioprine                     |
| 12          | 18         | F   | B2                                         | No               | 2                       | No                                       | None                          | Budesonide                       |
| 13          | 19         | M   | B1                                         | No               | < 1                     | No                                       | None                          | None                             |
| 14          | 21         | F   | B2                                         | No               | 1                       | No                                       | None                          | 5-ASA, oral steroids, budesonide |
| 15          | 26         | M   | B2                                         | No               | 8                       | Yes                                      | Azathioprine, Infliximab      | None                             |
| 16          | 35         | M   | B2                                         | No               | 8                       | No                                       | Azathioprine, 5-ASA           | None                             |
| 17          | 39         | M   | B3                                         | Yes              | 5                       | Yes                                      | None                          | None                             |
| 18          | 35         | M   | B2                                         | No               | 3                       | No                                       | Steroids                      | None                             |
| 19          | 68         | M   | B2                                         | No               | 40                      | Yes                                      | None                          | None                             |
| 20          | 49         | F   | B2                                         | No               | 15                      | Yes                                      | None                          | None                             |
| 21          | 47         | F   | B2                                         | No               | 21                      | Yes                                      | Steroids                      | None                             |

**Table S5. Clinical characteristics of the 16 patients with isolated colonic CD (L2 according to the Montreal classification)**

| Patient no. | Age, years | Sex | Disease behavior (according to Montreal classification) | Perianal disease | Disease duration, years | Personal history of intestinal resection | Previous medications                                            | Concomitant medications                     |
|-------------|------------|-----|---------------------------------------------------------|------------------|-------------------------|------------------------------------------|-----------------------------------------------------------------|---------------------------------------------|
| 1           | 21         | M   | B3                                                      | Yes              | <1                      | No                                       | None                                                            | None                                        |
| 2           | 30         | F   | B3                                                      | Yes              | 5                       | Yes                                      | Methotrexate, infliximab                                        | Parenteral nutrition, steroids, thioguanine |
| 3           | 50         | F   | B2                                                      | Yes              | 3                       | Yes                                      | Azathioprine, methotrexate                                      | Aminosalicylates                            |
| 4           | 31         | M   | B1                                                      | Yes              | 3                       | No                                       | Steroids, 5-ASA, azathioprine, infliximab, parenteral nutrition | Thalidomide                                 |
| 5           | 50         | F   | B1                                                      | Yes              | 5                       | No                                       | Antibiotics, 5-ASA, azathioprine                                | Infliximab                                  |
| 6           | 37         | F   | B3                                                      | Yes              | 22                      | No                                       | Antibiotics                                                     | None                                        |
| 7           | 59         | F   | B3                                                      | No               | 33                      | Yes                                      | Antibiotics, steroids                                           | None                                        |
| 8           | 23         | M   | B1                                                      | No               | 6                       | No                                       | Azathioprine, <i>E. coli</i> Nissle                             | None                                        |
| 9           | 25         | M   | B1                                                      | No               | 5                       | No                                       | 5-ASA                                                           | None                                        |
| 10          | 28         | F   | B1                                                      | Yes              | 6                       | No                                       | 5-ASA                                                           | None                                        |
| 11          | 35         | F   | B3                                                      | Yes              | 20                      | No                                       | None                                                            | None                                        |
| 12          | 45         | F   | B3                                                      | Yes              | 25                      | Yes                                      | Steroids, azathioprine                                          | <i>S. cerevisiae</i> orally administered    |
| 13          | 30         | F   | B1                                                      | No               | 2                       | No                                       | Steroids, azathioprine, 5-ASA                                   | Infliximab                                  |
| 14          | 23         | F   | B2                                                      | Yes              | 2                       | No                                       | Azathioprine                                                    | None                                        |
| 15          | 42         | F   | B2                                                      | Yes              | 25                      | No                                       | Azathioprine                                                    | None                                        |
| 16          | 32         | M   | B2                                                      | Yes              | 12                      | Yes                                      | 5-ASA, azathioprine                                             | None                                        |

**Table S6. Clinical characteristics of the 21 patients with ileocolonic CD (L3 according to the Montreal classification)**

| Patient no. | Age, years | Sex | Disease behavior (Montreal classification) | Perianal disease | Disease duration, years | Personal history of intestinal resection | Previous medications                                                                        | Concomitant medications |
|-------------|------------|-----|--------------------------------------------|------------------|-------------------------|------------------------------------------|---------------------------------------------------------------------------------------------|-------------------------|
| 1           | 24         | F   | B1                                         | No               | 1                       | No                                       | 5-ASA, steroids                                                                             | None                    |
| 2           | 36         | F   | NA                                         | No               | 14                      | No                                       | 5-ASA, azathioprine                                                                         | Steroids                |
| 3           | 38         | F   | B2                                         | No               | 5                       | No                                       | 5-ASA, steroids, azathioprine, infliximab                                                   | None                    |
| 4           | 81         | F   | B3                                         | No               | 23                      | Yes                                      | 5-ASA, steroids                                                                             | None                    |
| 5           | 31         | F   | B2                                         | Yes              | 8                       | No                                       | 5-ASA, steroids, infliximab, methotrexate, anti-IFN- $\gamma$                               | Azathioprine            |
| 6           | 25         | F   | B1                                         | Yes              | 5                       | No                                       | 5-ASA, steroids, azathioprine, infliximab, methotrexate, thalidomide, mycophenolate mofetil | Adalimumab              |
| 7           | 27         | M   | B2                                         | No               | < 1                     | No                                       | Budesonide                                                                                  | None                    |
| 8           | 20         | F   | B1                                         | No               | 3                       | No                                       | 5-ASA, steroids                                                                             | None                    |
| 9           | 21         | F   | B3                                         | Yes              | 15                      | Yes                                      | 5-ASA, azathioprine, infliximab                                                             | Steroids                |
| 10          | 22         | F   | B2                                         | No               | 6                       | Yes                                      | Steroids, infliximab                                                                        | Azathioprine            |
| 11          | 20         | F   | B1                                         | Yes              | 5                       | Yes                                      | Steroids, azathioprine, methotrexate, infliximab                                            | None                    |
| 12          | 23         | M   | B2                                         | Yes              | 10                      | No                                       | Steroids, azathioprine, methotrexate                                                        | None                    |
| 13          | 24         | M   | B1                                         | Yes              | 2                       | No                                       | None                                                                                        | Azathioprine            |
| 14          | 21         | F   | B1                                         | No               | 1                       | No                                       | Steroids                                                                                    | None                    |
| 15          | 23         | F   | B1                                         | No               | 7                       | No                                       | 5-ASA, budesonide                                                                           | None                    |
| 16          | 55         | F   | B2                                         | Yes              | 26                      | Yes                                      | None                                                                                        | None                    |
| 17          | 26         | F   | B1                                         | No               | 10                      | No                                       | Steroids                                                                                    | None                    |
| 18          | 69         | M   | B2                                         | Yes              | 33                      | Yes                                      | Azathioprine, 5-ASA, prednisolone, budesonide                                               | None                    |
| 19          | 47         | F   | B1                                         | No               | 7                       | No                                       | Methotrexate                                                                                | None                    |
| 20          | 28         | M   | B1                                         | No               | 2                       | No                                       | Steroids, methotrexate                                                                      | None                    |
| 21          | 38         | M   | B3                                         | Yes              | 12                      | Yes                                      | Azathioprine, prednisolone                                                                  | None                    |
